# Supplementary material for: CDK-mediated RNF4 phosphorylation regulates homologous recombination in S-phase
Source: PubMed Central journal article supplement — Nucleic Acids Res. 2015 May 6;43(11):5465–75. doi: 10.1093/nar/gkv434 (PMC4477664; doi:10.1093/nar/gkv434), 2015-05-06
Supplement: supp_gkv434_nar-00255-d-2015-File006.pdf [file supp_gkv434_nar-00255-d-2015-File006.pdf]

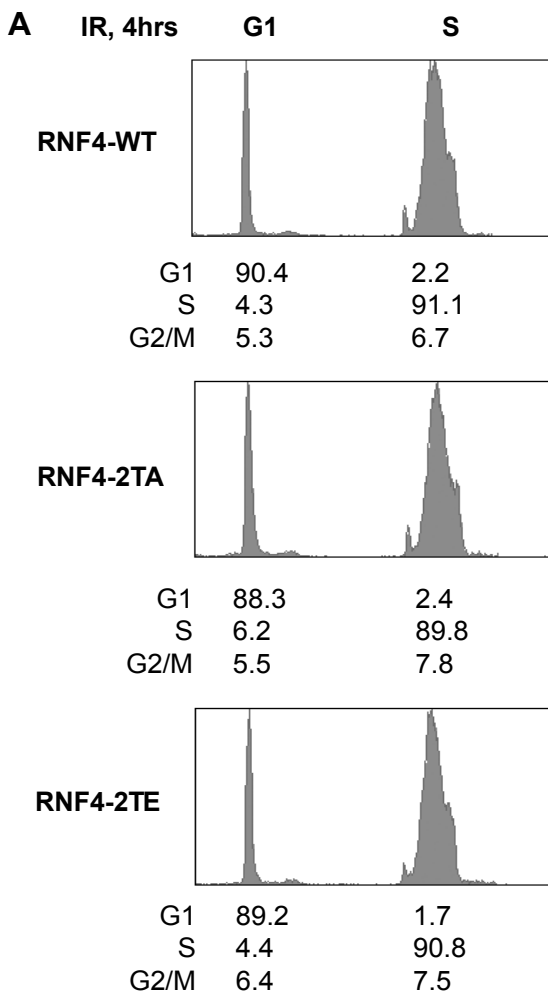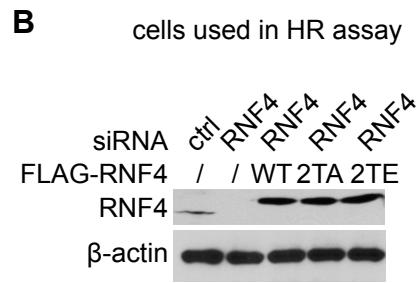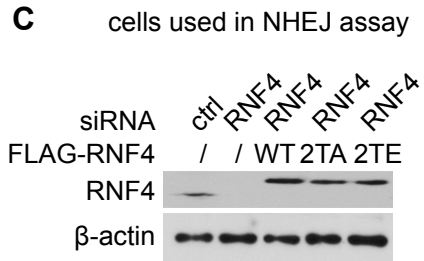

**Figure S1. (A)** The cell cycle profiles of the cells used in Figure 4A&B were analyzed by flow cytometry. **(B&C)** The cells used in Figure 4 C&D were collected. Expression of endogenous RNF4 and FLAG-RNF4 WT, 2TA or 2TE mutant were examined with indicated antibodies.
